# Supplementary material for: Self-priming compartmentalization digital LAMP for point-of-care
Source: Royal Society of Chemistry journal article supplement (doi:10.1039/c2lc40774d), 2012-01-01
Supplement: c2lc40774d.pdf [file c2lc40774d.pdf]

**Supplementary Material (ESI) for Lab on a Chip**  
**This journal is © The Royal Society of Chemistry 2012**

Table 1. The statistical analysis result of the digital LAMP

| $X_{dil}$        | Observed value |     |     | Average value | STDEV | Expected value | Average value of $-\ln(1-f_0)$ | STDEV |
|------------------|----------------|-----|-----|---------------|-------|----------------|--------------------------------|-------|
|                  | 1              | 2   | 3   |               |       |                |                                |       |
| <b>0.00001</b>   | 525            | 492 | 468 | 495           | 28.6  | 511            | 0.53                           | 0.041 |
| <b>0.000005</b>  | 270            | 282 | 219 | 257           | 33.5  | 291            | 0.24                           | 0.035 |
| <b>0.000001</b>  | 64             | 89  | 72  | 75            | 12.8  | 65             | 0.06                           | 0.011 |
| <b>0.0000001</b> | 16             | 12  | 8   | 12            | 4     | 7              | 0.01                           | 0.003 |

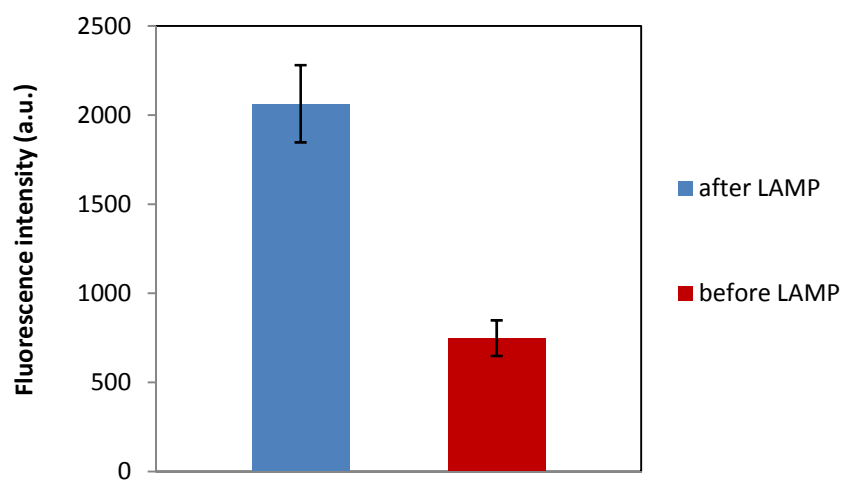

Figure S1. Comparison results of fluorescent intensity before and after LAMP. The average fluorescent intensity before LAMP was  $748 \pm 100$ , and the average fluorescent intensity after LAMP was  $2064 \pm 216$ ; a threshold value (the fluorescent intensity equals to 1500) was used to discriminate against background.

**Supplementary Material (ESI) for Lab on a Chip**  
**This journal is © The Royal Society of Chemistry 2012**

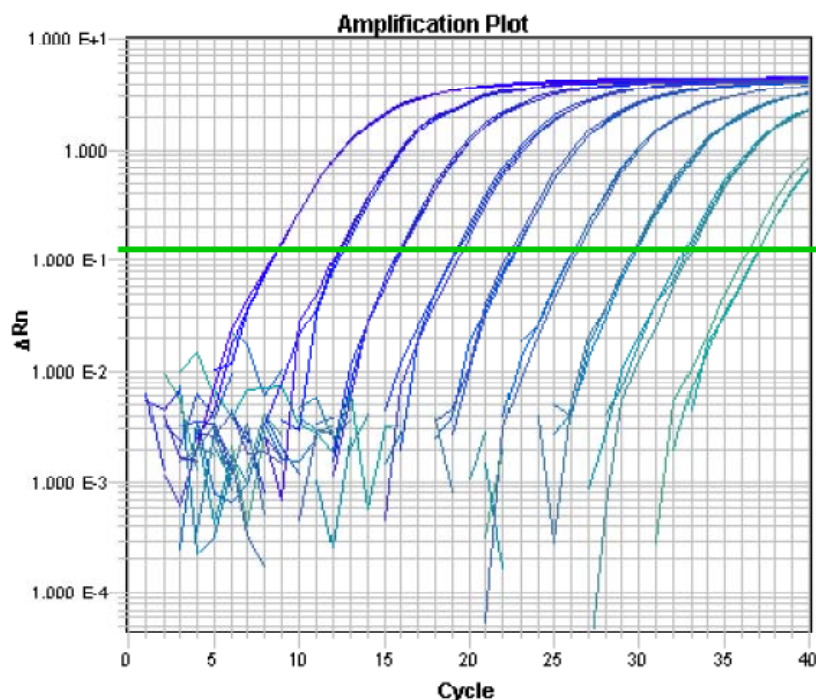

Figure S2. The real-time PCR amplification plots of the pMD 18-T-HA  $\beta$ -actin DNA. A ten-fold serial dilution of  $\beta$ -actin DNA ranging from  $10^8$  to  $10^0$  copies per  $\mu\text{L}$  were prepared to perform the real-time PCR. Each concentration was repeated three times and the amplification was displayed from left to right.

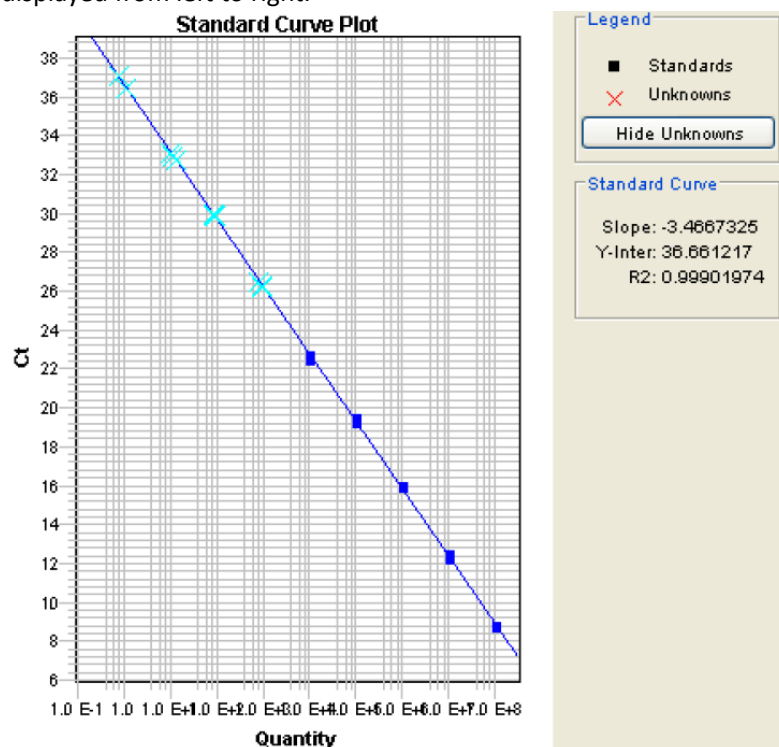

Figure S3. The calculation of the DNA template concentration (copies per  $\mu\text{L}$ ). The real-time PCR measurements were carried out using an ideally prepared standard curve ( $R^2=0.999$ ). For the lowest four dilutions measured, we determined the DNA template concentration (copies per  $\mu\text{L}$ ) by the regressive equation. A stock solution of  $c_0 = (1.09 \pm 0.18) \times 10^8$  copies per  $\mu\text{L}$  was obtained.
